# Supplementary material
Source: Springer Nature journal article supplement (https://www.springermedizin.de/resource/supplementary/13058_2013_3370_MOESM1_ESM.pdf/9703966)

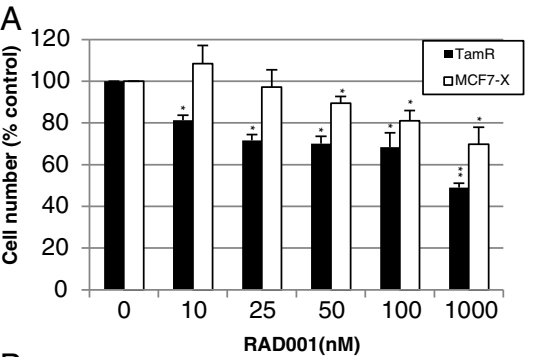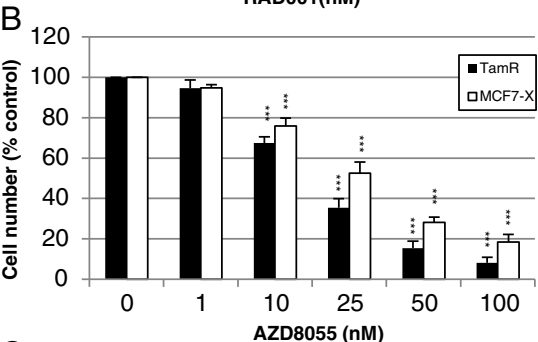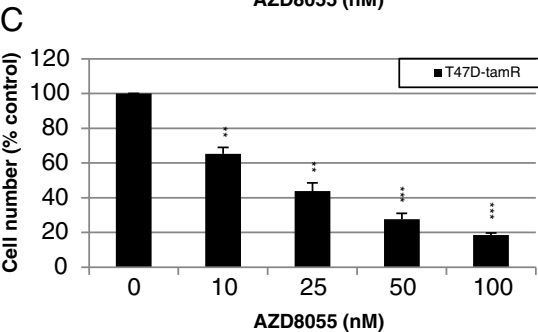

**D**

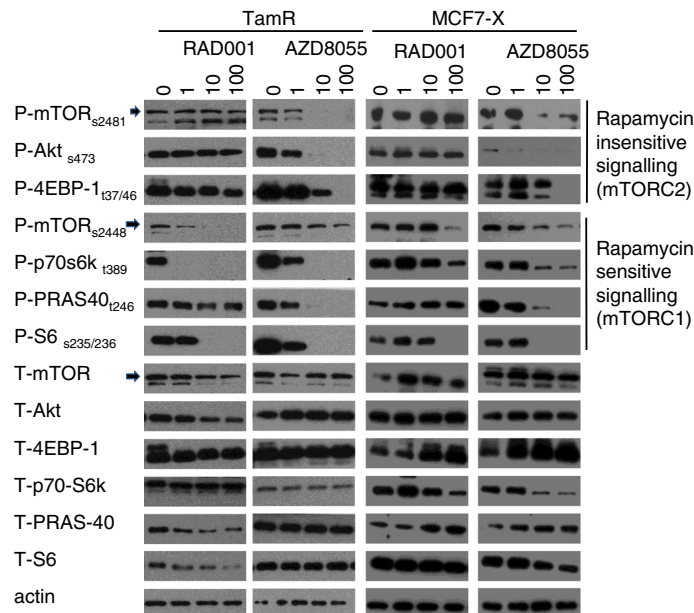

Supplement: MOESM1 [file 9703966]
